# Supplementary material for: Comparative Analyses of mTOR/Akt and Muscle Atrophy-Related Signaling in Aged Respiratory and Gastrocnemius Muscles
Source: MDPI journal article supplement (doi:10.3390/ijms21082862), 2020-04-20
Supplement: s1 [file s1]

Article

# Comparative analyses of mTOR/Akt and muscle atrophy-related signaling in aged respiratory and gastrocnemius muscles

Kun Woo Kim <sup>1,†</sup>, Hye-Jeong Cho <sup>2,3,4,†</sup>, Sana Abdul Khaliq <sup>2,3,4,†</sup>, Kuk Hui Son <sup>1,\*</sup>, and Mee-Sup Yoon <sup>2,3,4,\*</sup>

<sup>1</sup> Department of Thoracic and Cardiovascular Surgery, Gachon University Gil Medical Center, College of Medicine, Gachon University, Incheon 21565, Republic of Korea

<sup>2</sup> Department of Molecular Medicine, School of Medicine

<sup>3</sup> Lee Gil Ya Cancer and Diabetes Institute

<sup>4</sup> Department of Health Sciences and Technology, GAIHST, Gachon University, Incheon 21999, Republic of Korea

† These authors contributed equally to this work

\* Correspondence: [dr632@gilhospital.com](mailto:dr632@gilhospital.com) (K.H.S); Tel.: 82-32-460-3666 (K.H.S); [msyoon@gachon.ac.kr](mailto:msyoon@gachon.ac.kr) (M.-S.Y.); Tel.: 82-32-899-6067 (M.-S.Y.)

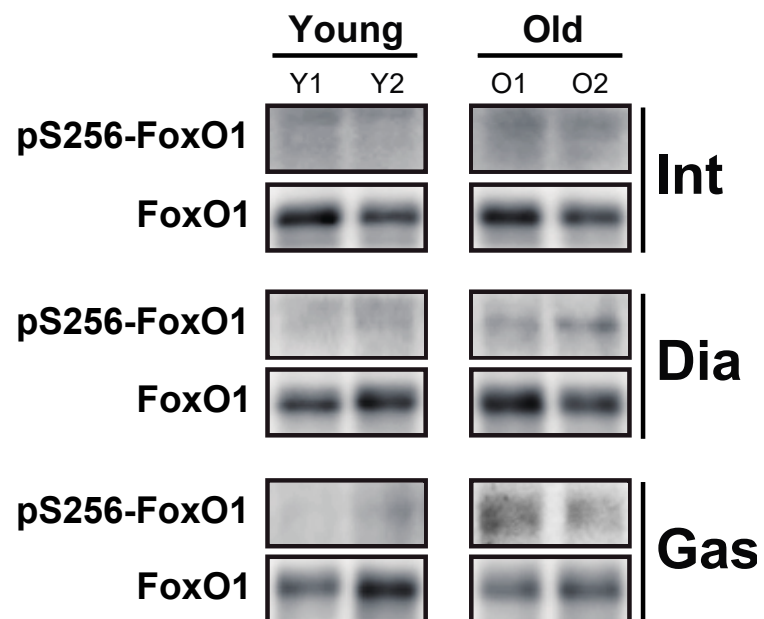

**Supplementary Figure S1. Comparison of the phosphorylation of FoxO1 between the respiratory muscles and gastrocnemii with age.** Each muscle was lysed and analyzed by western blotting (n=6). Young : 6-month-old rat, Old : 20-month-old rat. Abbreviations: diaphragm muscle (Dia); gastrocnemius muscle (Gas); intercostal muscle (Int).

**Supplementary Table S1. Ages of Rats for Age-related studies**

| Title of the study                                                                                                                                                     | Rat strain                                        | Ages of Young subjects (months ) | Ages of Old subjects (months ) | Ref           |
|------------------------------------------------------------------------------------------------------------------------------------------------------------------------|---------------------------------------------------|----------------------------------|--------------------------------|---------------|
| Effect of Resistance Training on Extracellular Matrix Adaptations in Skeletal Muscle of Older Rats                                                                     | Wistar rats                                       | 3                                | 21                             | <sup>1</sup>  |
| Skeletal Muscle Regeneration in Very Old Rats                                                                                                                          | Wistar rats                                       | 4                                | 32                             | <sup>2</sup>  |
| Myosin heavy chain composition in young and old rat skeletal muscle                                                                                                    | Fischer 344 rats                                  | 3                                | 22                             | <sup>3</sup>  |
| Muscle Wasting in Aged, Sarcopenic Rats Is Associated with Enhanced Activity of the Ubiquitin Proteasome Pathway                                                       | Harlan Sprague-Dawley                             | 4                                | 30                             | <sup>4</sup>  |
| Fiber Type Composition of Unoperated Rat Soleus and Extensor Digitorum Longus Muscles after Unilateral Isotransplantation of a Foreign Muscle in Long-Term Experiments | Rats of the Lewis strain                          | 4                                | 17                             | <sup>5</sup>  |
| Skeletal muscle metabolism in rats with low and high intrinsic aerobic capacity                                                                                        | N.A.                                              | 9                                | 18                             | <sup>6</sup>  |
| Ageing prolongs inflammatory marker expression in regenerating rat skeletal muscles after injury                                                                       | Fischer 344 rats                                  | 3                                | 24                             | <sup>7</sup>  |
| Age-Related Gene Expression Signature in Rats Demonstrate Early, Late, and Linear Transcriptional Changes from Multiple Tissues                                        | Sprague Dawley                                    | 6                                | 21-27                          | <sup>8</sup>  |
| Mitochondrial and Metabolic Gene Expression in the Aged Rat Heart                                                                                                      | Male Fischer 344 x Brown Norway hybrid rats (FBN) | 6                                | 34                             | <sup>9</sup>  |
| Aging-associated dysfunction of Akt/protein kinase B: S-nitrosylation and acetaminophen intervention                                                                   | F344BN rats                                       | 6                                | 27, 33                         | <sup>10</sup> |

## References

1. Guzzoni, V. *et al.* Effect of Resistance Training on Extracellular Matrix Adaptations in Skeletal Muscle of Older Rats. *Front Physiol* **9**, 374 (2018).
2. Carlson, B.M., Dedkov, E.I., Borisov, A.B. & Faulkner, J.A. Skeletal muscle regeneration in very old rats. *J Gerontol A Biol Sci Med Sci* **56**, B224-233 (2001).
3. Sullivan, V.K. *et al.* Myosin heavy chain composition in young and old rat skeletal muscle: effects of endurance exercise. *Journal of applied physiology* (Bethesda, Md. : 1985) **78**, 2115-2120 (1995).
4. Altun, M. *et al.* Muscle wasting in aged, sarcopenic rats is associated with enhanced activity of the ubiquitin proteasome pathway. *The Journal of biological chemistry* **285**, 39597-39608 (2010).
5. Soukup, T., Smerdu, V. & Zacharova, G. Fiber type composition of unoperated rat soleus and extensor digitorum longus muscles after unilateral isotransplantation of a foreign muscle in long-term experiments. *Physiol Res* **58**, 253-262 (2009).
6. Shi, M. *et al.* Skeletal muscle metabolism in rats with low and high intrinsic aerobic capacity: Effect of aging and exercise training. *PLoS One* **13**, e0208703 (2018).
7. van der Poel, C. *et al.* Ageing prolongs inflammatory marker expression in regenerating rat skeletal muscles after injury. *J Inflamm (Lond)* **8**, 41 (2011).
8. Shavlakadze, T. *et al.* Age-Related Gene Expression Signature in Rats Demonstrate Early, Late, and Linear Transcriptional Changes from Multiple Tissues. *Cell Rep* **28**, 3263-3273 e3263 (2019).
9. Barton, G.P., Sepe, J.J., McKiernan, S.H., Aiken, J.M. & Diffie, G.M. Mitochondrial and Metabolic Gene Expression in the Aged Rat Heart. *Frontiers in Physiology* **7** (2016).
10. Wu, M. *et al.* Aging-associated dysfunction of Akt/protein kinase B: S-nitrosylation and acetaminophen intervention. *PLoS One* **4**, e6430 (2009).
